# Supplementary material for: Sharing Information: A Guide to the Family Educational Rights and Privacy Act and Participation in Juvenile Justice Programs. Program Report.
Source: Royal Society of Chemistry journal article supplement (doi:10.1039/d2cp00678b), 1997-06-01
Supplement: d2cp00678b1.pdf [file d2cp00678b1.pdf]

## Electronic Supplementary Information

# **Structural dynamics of Ru cluster during nitrogen dissociation in ammonia synthesis**

Qi-Yuan Fan,<sup>1,2</sup> Jing-Li Liu,<sup>1,2</sup> Fu-Qiang Gong,<sup>1</sup> Ye Wang,<sup>1</sup> and Jun Cheng<sup>1\*</sup>

<sup>1</sup> State Key Laboratory of Physical Chemistry of Solid Surface, Collaborative Innovation Center of Chemistry for Energy Materials (iChEM), College of Chemistry and Chemical Engineering, Xiamen University, Xiamen, 361005, China

<sup>2</sup> These authors contributed equally

E-mail: chengjun@xmu.edu.cn

## Contents

|         |                                                                                       |    |
|---------|---------------------------------------------------------------------------------------|----|
| Fig. S1 | Kinetic energy partitioning.....                                                      | S3 |
| Fig. S2 | Probability distributions and mean forces obtained by different sampling methods..... | S4 |
| Fig. S3 | PMF curves at different temperatures.....                                             | S5 |
| Fig. S4 | Average forces at different N-N bond lengths .....                                    | S6 |
| Fig. S5 | Hysteresis of mean force.....                                                         | S7 |
| Fig. S6 | Specific heat capacity curves.....                                                    | S8 |

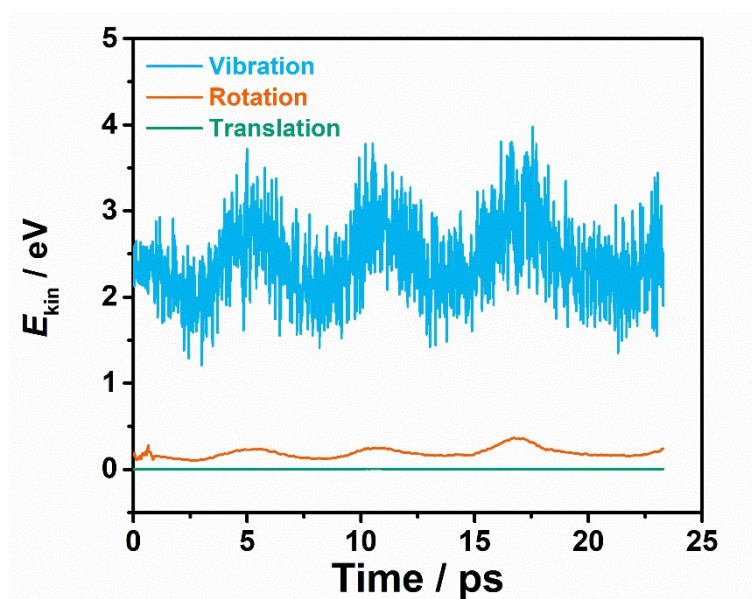

**Fig. S1.** Kinetic energy partitioning for the Ru-N<sub>2</sub> system thermostated by Nosé–Hoover chain at 523 K. The N-N bond length is controlled to 1.84 Å.

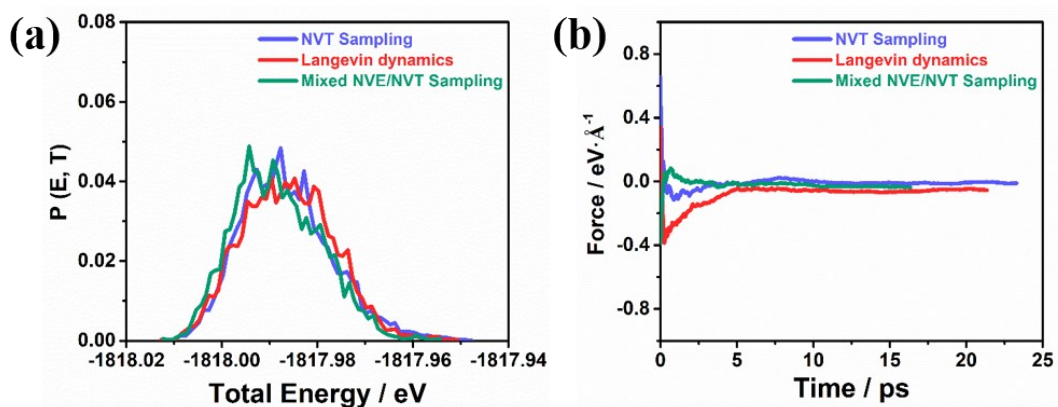

**Fig. S2.** (a) Total energy probability distributions  $P(E, T)$  and (b) the time accumulative averages of mean forces obtained by NVT combined with Nosé–Hoover chain thermostat with a chain length of three (blue line), the Langevin dynamics (red line), and mixed NVE/NVT sampling (green line) at 523 K. The N-N bond length is controlled to 1.84 Å. The probability distributions and mean forces between NVT and mixed NVE/NVT sampling are very similar, indicating that the interference issue due to the coupling the internal degrees of freedom of the cluster with a thermostat in this work is insignificant.

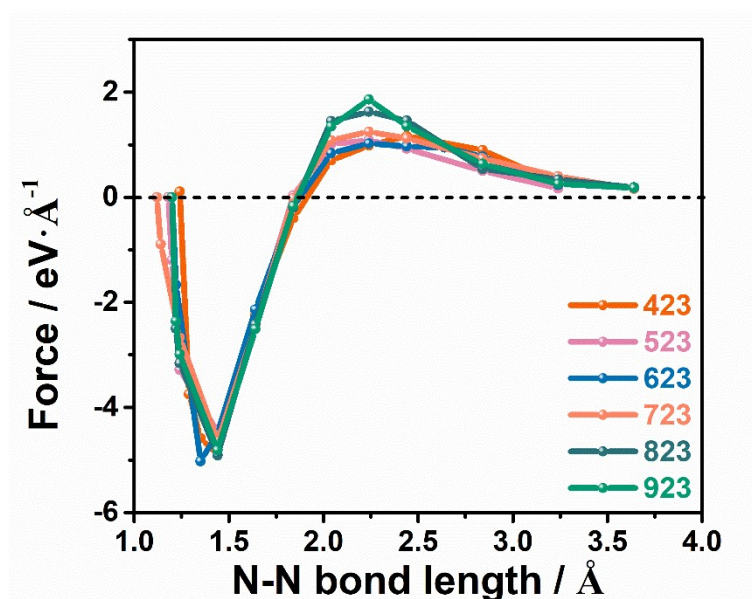

**Fig. S3.** Calculated average forces for  $\text{N}_2$  dissociation on  $\text{Ru}_{19}$  cluster as a function of N-N bond length at different temperatures (unit: K).

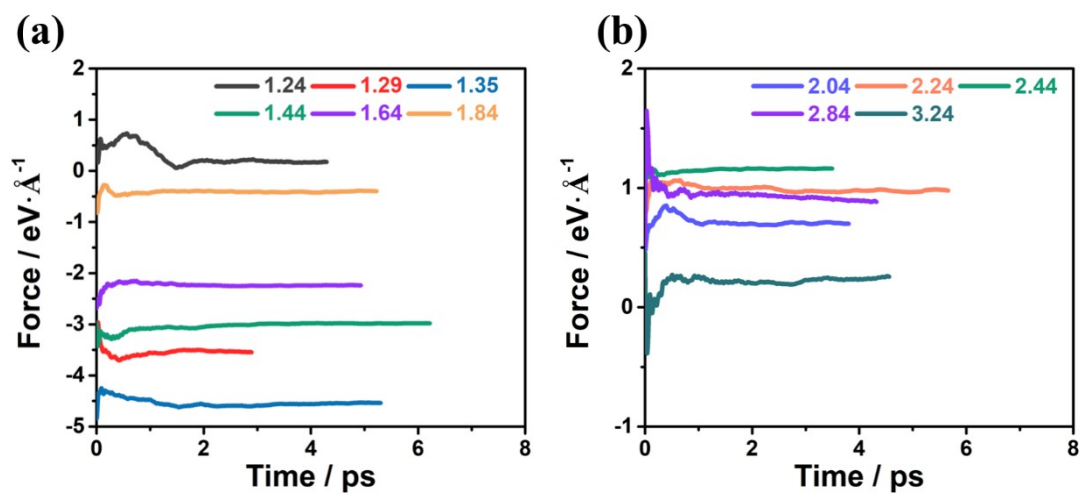

**Fig. S4.** (a) Time accumulative averages of the forces at the N-N bond length varying from 1.24 Å to 1.84 Å and (b) from 2.04 Å to 3.24 Å at 423 K calculated using AIMD. The inset values are the corresponding N-N bond lengths given in Å.

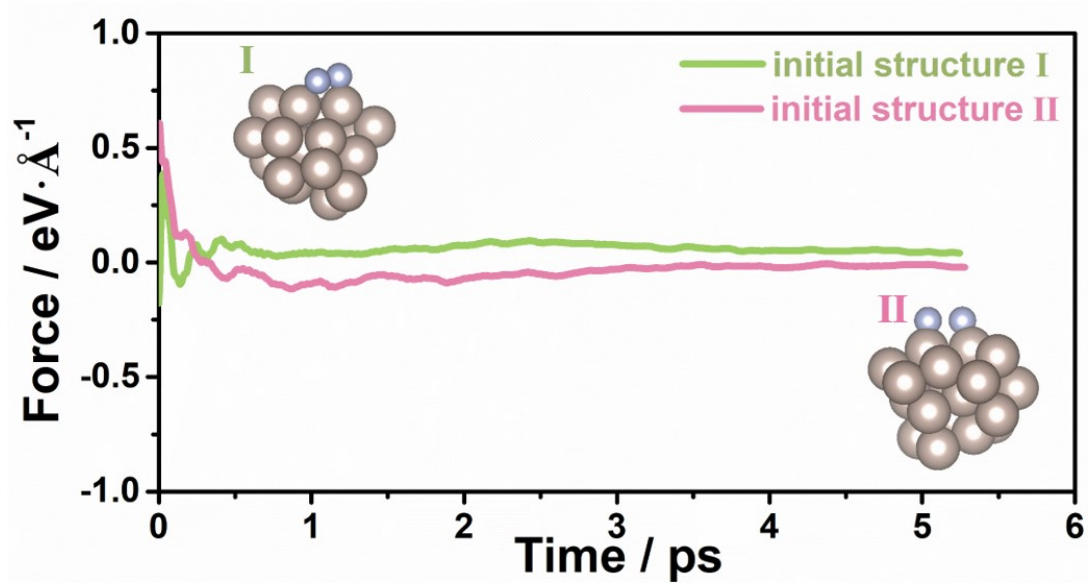

**Fig. S5.** Time accumulative averages of mean forces at the N-N bond length of 1.84 Å calculated using different initial structures at 523 K. The inserts are the snapshots of initial structures. I, the N-N bond length is 1.44 Å. II, the N-N bond length is 2.04 Å. The silver and blue balls represent Ru and N atoms.

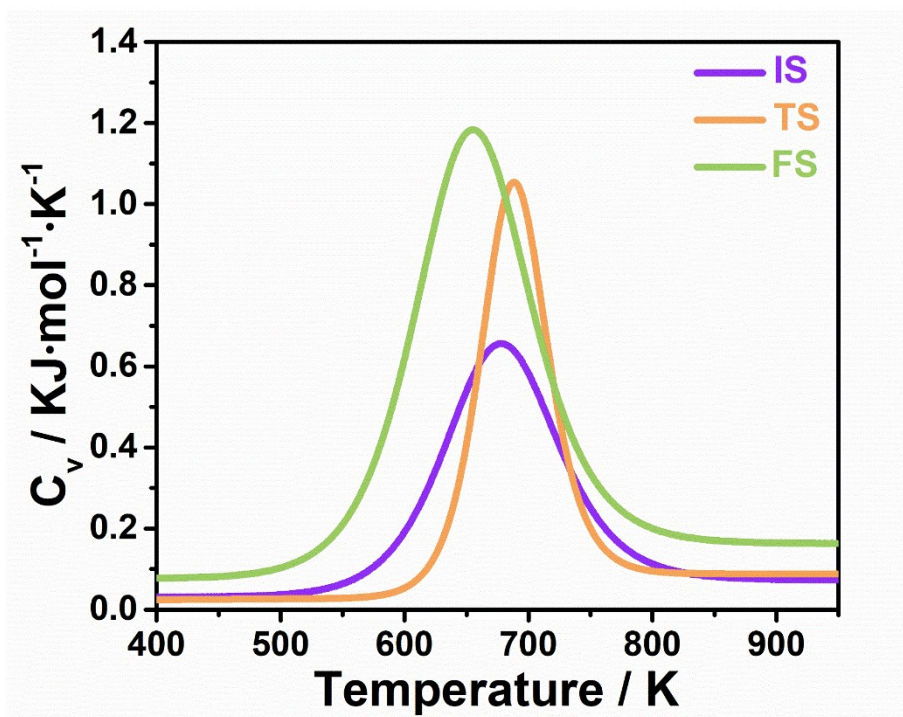

Fig. S6. Specific heat capacity curves of initial (IS), transition (TS), and final states (FS) of the  $\text{N}_2$  dissociation on  $\text{Ru}_{19}$  cluster.
